# Supplementary material
Source: publisher site journal article supplement (https://www.dovepress.com/article/194056)
Supplement: Supplementary file 1 [file get_supplementary_file.php]

**Bisphosphonates and primary breast cancer risk: an updated** **systematic review and meta-analysis involving 963,995 women**

Yupeng Liu, PhD; Xiaosan Zhang, PhD; Hongru Sun, MSc; Shu Zhao, PhD; Yuxue Zhang, MSc; Dapeng Li, MSc; Qingyuan Zhang, PhD; Yashuang Zhao, PhD

**Supplementary Material**

Correspondence to: Dr. Yupeng Liu

Department of Preventive Medicine, School of Public Health and Management

Wenzhou Medical University

Wenzhou 325035, P. R. China

Tel/Fax: +86 (0) 577 8669 9182

E-mail: liuyupenf@126.com

or Professor Yashuang Zhao

Department of Epidemiology, School of Public Health

Harbin Medical University

Harbin 150086, P. R. China

Tel/Fax: +86 (0) 451 8750 2823

E-mail: zhao_yashuang@263.net

or Professor Qingyuan Zhang

Department of Medical Oncology, The Third Affiliated Hospital

Harbin Medical University

Harbin150081, P. R. China

Tel/Fax: +86 (0) 451 8629 8116

E-mail: zhma19650210@126.com

| **Table of Contents** | | **Pages** |
| --- | --- | --- |
| **Supplementary Discussion** | | 1 |
| **Supplementary Tables** | | 2-10 |
| 1 | eTable 1. Characteristics of cohort studies included in this meta-analysis | 2 |
| 2 | eTable 2. Characteristics of case-control studies included in this meta-analysis | 3 |
| 3 | eTable 3. Characteristics of randomized controlled trials addressing the association between bisphosphonates and the risk of primary breast cancer | 4 |
| 4 | eTable 4. Sensitivity analyses by comparisons of the pooled results of the maximally and minimally adjusted effect estimates of the association between bisphosphonates and breast cancer risk | 5 |
| 5 | eTable 5. Sensitivity analyses excluding the study that has the most relative weight in subgroups | 6 |
| 6 | eTable 6. Characteristics of cohort studies addressing the association between bisphosphonates and the risk of contralateral breast cancer | 7 |
| 7 | eTable 7. Characteristics of case-control studies addressing the association between bisphosphonates and the risk of contralateral breast cancer | 8 |
| 8 | eTable 8. Publication bias | 9 |
| 9 | eTable 9. Levels of evidence for associations between bisphosphonates and primary breast cancer risk | 10 |
| **Supplementary Figures** | | 11-22 |
| 10 | eFigure 1. Forest plot for the association between bisphosphonates and the risk of primary invasive breast cancer | 11 |
| 11 | eFigure 2. Forest plot for the association between bisphosphonates and primary breast cancer risk in postmenopausal women | 12 |
| 12 | eFigure 3. Subgroup analyses of the association between bisphosphonates and primary breast cancer risk according to duration of bisphosphonate use. | 13 |
| 13 | eFigure 4. Cumulative meta-analysis of the association between bisphosphonates and primary breast cancer risk according to duration of bisphosphonate use | 14 |
| 14 | eFigure 5. A sensitivity analysis by excluding retrospective case-control studies | 15 |
| 15 | eFigure 6. A sensitivity analysis by excluding randomized controlled trials | 16 |
| 16 | eFigure 7. Forest plot for the association between bisphosphonates and the risk of contralateral breast cancer in women with primary breast cancer | 17 |
| 17 | eFigure 8. A sensitivity analysis by combining the results from studies addressing the associations of bisphosphonates with the risk of both primary and contralateral breast cancer | 18 |
| 18 | eFigure 9. Meta-regression analyses of the association between bisphosphonates and primary breast cancer risk | 19-20 |
| 19 | eFigure 10. Funnel plots of potential publication | 21 |
| 20 | eFigure 11. Risk of bias of randomized controlled trials | 22 |
| **Appendix** | | 23-25 |
| 21 | **Appendix A**. PRISMA Checklist | 23-24 |
| 22 | **Appendix B**. Methodological quality score of the cohort and case-control studies | 25 |

**Supplementary Discussion**

Additionally, we assessed the statistical power of these two RCTs by using the software of PASS version 11.0.7 (NCSS LLC., USA). In the Hue’s study, the power of statistical analyses for the association between bisphosphonates and BCa was only 19.53% and 8.58% for FIT and HORIZON-PFT, respectively, based on the sample size (6194 participants in FIT and 7580 in HORIZON-PFT), the incidence of breast cancer in the control groups (1.49% in FIT and 0.77% in HORIZON-PFT), and the effect estimates (1.24 for FIT and 1.15 for HORIZON-PFT). Even though pooling the data from the two trials, the power was only 21.71%, indicating an overall 78.29% risk of type II error. Given the limited number of BCa patients during the follow-up period (165 patients from the combined dataset), this low power is not surprising. In contrast, the included observational studies, especially prospective cohort studies, with a large sample size, have an extremely high power of statistical analyses to detect the association. The pooling analysis of cohort studies had a power of 99.81% (with a two-sided alpha of 0.05) to detect a 10% reduction of the risk of developing primary BCa in the bisphosphonate users.

**Supplementary TABLES**

**eTable 1. Characteristics of cohort studies included in this meta-analysis**

| **Study,**  **Country** | **Population characteristics mean age (SD)/median age (range), years** | **Study period, Follow-up duration  mean (SD) , years** | **No. of BPs-users (No. of cases)** | | **No. of nonusers (No. of cases)** | **Types of BPs,  No. of users (%)** | **Data sources of BPs prescription** | **BCa diagnosis** |  | **Adjusted/controlled factors** | **Quality Score* (%)** |
| --- | --- | --- | --- | --- | --- | --- | --- | --- | --- | --- | --- |
| Chiang 2012 16 Taiwan, China | Postmenopausal women aged over 55 BPs-users: 73.5(8.4) Non-users: 73.4(8.4) | 1998-2010 BPs-users: 4.3(2.5) Non-users: 4.9(2.6) | 6906 (44) | 20697 (165) | | All alendronate, Alendronate: 6909 (100.0) | NHIRD | Hospital diagnosis, mostly confirmed by the pathological examination |  | Age, osteoporosis, hypertension, diabetes, benign breast disease, morbid obesity, statin use, chronic obstructive pulmonary disease, oestrogen use, dyslipidemia, chronic kidney disease, coronary artery disease, colorectal polyp, etc. | 80 |
| Cardwell 2011 17 the United Kingdom | UKGPRD  81% female with a mean age of 70  Both groups: 70.0(11.4) | 1996-2006 BPs-users: 4.5 (2.6)  Non-users: 4.4 (2.6) | 34049 (369) | 34049 (501) | | Any BPs, Alendronate: 23834 (70.0) Nitrogen containing BPs: 29623 (87.0) | UKGPRD | Hospital diagnosis, identified from the UKGPRD for diagnosis |  | Age, sex, BMI, alcohol, smoking, NSAID prescription, glucocorticoid steroid, vitamin D prescription and calcium, history of osteoporosis or osteopenia etc. | 86 |
| Vestergaard 2011 24 Denmark | Women aged over 40 Both groups: 71.1(10.7) | 1996-2006 NS | 81329 (884) | 261322 (3465) | | Alendronate: 45162(51.8) Etidronate: 34103 (39.2) Risedronate: 1156 (1.3) Ibandronate: 540 (0.6) Clodronate: 339 (0.4) Pamidronate: 21 (<0.1) Zoledronate: 8 (<0.1) | DNPD | Hospital diagnosis, identified from the Danish cancer registry |  | Age, use of systemic hormone therapy, irradiation, chemotherapy, alcoholism, etc. | 78 |
| Chlebowski 2010 25 the United States | Postmenopausal women Both groups: 63.8 (50-79) | 1993-2005 Both groups: 8.5 | 2816 (64) | 151952 (5092) | | Alendronate: 2527 (89.7) Etidronate: 285 (10.1) Pamidronate: 1 (<0.1) Tiludronate: 1 (<0.1) More than one: 2 (0.1) | An interview-administered questionnaire | Hospital diagnosis,  verified at each clinic by medical record and pathology report |  | Age, ethnicity, smoking, alcohol use, physical activity, BMI, mammogram in the last 2 years, chemotherapy, calcium, vitamin D, 5-year risk of hip fracture, Gail 5-year risk of BCa, etc. | 81 |
| Fournier 201718  French  The E3N cohort | Postmenopausal Women 62.8 (6.4)  BPs-users: 64.8 (6.6) Non-users: 62.3 (6.3) | 2004-2011  Both groups:  7.2 (1.7) | 12935(308) | 51503(2099) | | Any BPs†,  Alendronate: 14071  Risedronate: 11097  Ibandronate: 4246 Etidronate: 1461 Zoledronate: 693  Tiludronate: 2 | A series of questionnaires | Self-report using a follow-up questionnaire and 95% cases with pathology reports |  | BMI, years of schooling, alcohol intake, personal history of fractures, osteoporosis and bone densitometries, parity and age at first birth, use of oral contraceptives, time since menopause, history of breast cancer in first-degree relatives,  personal history of benign breast disease, hormone replacement therapy use, self-report of a mammogram performed during the previous follow-up cycle, raloxifene, and vitamin D | 89 |

Abbreviations: BCa, breast cancer; BMI, body mass index; BPs, bisphosphonates; CIPD, the Catastrophic Illness Patient Database; DNPD, the Danish National Prescription Database; NHIRD, the National Health Insurance Research Database; NS, not stated; NSAID, nonsteroidal anti-inflammatory drug; SD, standard deviation; UKGPRD, the United Kingdom General Practice Research Database; The E3N cohort, the French prospective Etude Epidemiologique aupres de femmes de la Mutuelle Generale de l'Education Nationale cohort.

*The quality score of each study is presented as a percentage of the maximum score.

†Did not report the numbers of BPs users but reported the number of person-years of BPs users.

**eTable 2. Characteristics of case-control studies included in this meta-analysis**

| **Study, Country,**  **Study design** | **Population characteristics mean age (SD)/median age (range), years** | **Study period** | **No. of cases (No. of BPs-users)** | **No.of controls (No. of BPs-users)** | **Types of BPs,  No. of users (%)** | **Data sources of BPs prescription** | **BCa diagnosis** |  | **Adjusted/controlled factors** | **Quality Score* (%)** |
| --- | --- | --- | --- | --- | --- | --- | --- | --- | --- | --- |
| Rennert 2010 34 Israel  Case-control (Population-based individually matched by age, residence, and ethnic group) | Postmenopausal women Case: 63.6 Control: 65.6 | 2000- | 1832 (193) | 2207 (326) | Alendronate:  519 (86.7) | CHS | Hospital diagnosis, identified independently by the diagnosing hospitals |  | Age, residence, ethnicity, BMI, age at first pregnancy, family history of BCa, first degree, sports activity, fruits consumption, etc. | 78 |
| Newcomb 2010 33 the United States  Case-control (Population-based, frequency matched by age) | Women aged 20–69 Case: 54.2(8.9) Control: 54.8(8.9) | 2003-2006 | 2936 (106) | 2975 (161) | Any BPs† | An interview  -administered questionnaire | Hospital diagnosis, identified from Wisconsin's mandatory cancer registry |  | Age at diagnosis, parity, age at first live birth, family history of breast cancer, BMI, menopausal status, type of hormone use, mammography, osteoporosis, smoking, height change etc. | 73 |
| Vinogradova 201319  the United Kingdom  a nested case-control study from the QResearch and CPRD databases  (Population-based individually matched by age, sex, practice and calendar year) | **QResearch:**  Case: 69.4(9.8) Control: 69.4(9.7) **CPRD:**  Case: 69.9(10.4) Control: 69.7(10.2) | 1997-2011 | **QResearch:**  24489 (3827)  **CPRD:**  25444 (3769) | **QResearch:**  113945 (17883)  **CPRD:**  118835 (17490) | Any BPs  Alendronate  Etidronate  Risedronate  Ibandronate | BNF | From the two largest primary-care databases in the UK:  QResearch and CPRD |  | BMI, smoking status, alcohol consumption, ethnicity, rheumatoid arthritis, osteoporosis and fractures, use of other osteoporosis drugs, vitamin D, NSAIDs, corticosteroids, acid-lowering drugs, years of data, family history of breast cancer, benign breast disease, use of oral contraceptives and hormone replacement therapy. | 75 |

Abbreviations: BCa, breast cancer; BMI, body mass index; BNF, British National Formulary; BPs, bisphosphonates; CHS, the Clalit Health Services pharmacy records; NSAID, nonsteroidal anti-inflammatory drugs; SD, standard deviation;

*The quality score of each study is presented as a percentage of the maximum score.

†Did not report the types and numbers of BPs users.

**eTable 3. Characteristics of randomized controlled trials addressing the association between bisphosphonates and the risk of primary breast cancer**

| **Study,**  **Country** | **Population characteristics mean age (SD)/median age (range), years** | **Study period, Follow-up duration  mean (SD) , years** | **No. of BPs-users (No. of Events)** | **No. of nonusers (No. of Events)** | **BPs treatment** | | **BCa diagnosis** | |  | | **Outcomes**  **/End-points** | | **Jadad Score** | |
| --- | --- | --- | --- | --- | --- | --- | --- | --- | --- | --- | --- | --- | --- | --- |
| Hue 2014 14 FIT  a randomized double-blind placebo-controlled interventional trial  the United States | Postmenopausal women 55-81 Alendronate: 68.1(6.2) Placebo: 68.2(6.1) | 1992/1993- 3.8 (0.8) | 3103 (57) | 3091 (46) | | Daily oral alendronate sodium (5mg/day for 2 years and 10 mg/day for 2 years) | | Adverse events reports and supporting medical records† | |  | | Fracture | | 4 | |
| Hue 2014 14 HORIZON-PFT  the United States | Postmenopausal women 65-89 Zoledronic acid: 73.1 (5.3) Placebo: 73.0 (5.4) | 2002-2011  2.8 (0.6) | 3792 (33) | 3788 (29) | | Annual intravenous infusions of zoledronic acid 5mg for 3 years | | Adverse events reports and supporting medical records† | |  | | Fracture and BMD | | 4 | |

†FIT and HORIZON-PFT were not initially designed to study breast cancer outcomes and identified new breast cancer cases using adverse events reports and supporting medical records.

**eTable 4. Sensitivity analyses by comparisons of the pooled results of the maximally and minimally adjusted effect estimates of the association between bisphosphonates and breast cancer risk***

| **Subgroups** | **No. of studies** | **Effect estimate (95% CI)** | ***I*2 (%)** | ***P*-value for heterogeneity** |  | **Confounding RR† (*P*-value)** |
| --- | --- | --- | --- | --- | --- | --- |
| **Total** |  |  |  |  |  |  |
| Maximal | 10 | 0.879 (0.826-0.936) | 35.53 | 0.124 |  | 1.060, (0.256) |
| Minimal | 10 | 0.829 (0.766-0.898) | 66.16 | 0.002 |  |
| **Case-control study** |  |  |  |  |  |  |
| Maximal | 3 | 0.834 (0.711-0.979) | 61.79 | 0.073 |  | 1.090, (0.511) |
| Minimal | 3 | 0.765 (0.625-0.936) | 80.52 | 0.006 |  |
| **Cohort study** |  |  |  |  |  |  |
| Maximal | 5 | 0.874 (0.803-0.951) | 33.18 | 0.200 |  | 1.059, (0.373) |
| Minimal | 5 | 0.825 (0.750-0.906) | 53.89 | 0.070 |  |
| **Randomized controlled trials** |  |  |  |  |  |  |
| Maximal | 2 | 1.127 (0.808-1.573) | 0.00 | 0.918 |  | 0.935, (0.772) |
| Minimal | 2 | 1.205 (0.887-1.637) | 0.00 | 0.815 |  |
| **Invasive BCa** |  |  |  |  |  |  |
| Maximal | 6 | 0.829 (0.692-0.994) | 59.54 | 0.030 |  | 1.067, (0.602) |
| Minimal | 6 | 0.770 (0.624-0.951) | 75.53 | 0.001 |  |
| **Postmenopausal** |  |  |  |  |  |  |
| Maximal | 7 | 0.888 (0.798-0.989) | 30.50 | 0.195 |  | 1.043, (0.642) |
| Minimal | 7 | 0.851 (0.737-0.982) | 67.47 | 0.005 |  |
|  |  |  |  |  |  |  |

Abbreviations: BCa, breast cancer; BPs, bisphosphonates; CI, conﬁdence interval.

*We used a random-effects model to pool the effect estimates and therefore be more conservative.

†Confounding RR was defined as the ratio of the pooled results of the maximally and the minimally adjusted effect estimates. If the *P*-value for confounding RR was less than 0.05, the impact of adjustment for confounders on the pooled results was statistically significant; otherwise, the confounding effect of the adjusted factors was small or null. For protective factors, if the confounding RR <1, it indicates that the adjusted confounders have obscured an inverse association; if the confounding RR >1, it indicates that the adjusted confounders have exaggerated an inverse association.

**eTable 5. Sensitivity analyses excluding the study that has the most relative weight in subgroups***

| **Subgroups** | **No. of studies** | **Effect estimate (95% CI)** | **Heterogeneity**  **between-study** | |  | ***P*-value for heterogeneity**  **between subgroups** |
| --- | --- | --- | --- | --- | --- | --- |
| ***I*2 (%)** | ***P*-value** |  |
|  |  |  |  |  |  |  |
| Total | 10 | 0.879 (0.826-0.936) | 35.53 | 0.124 |  | 0.738 |
| Total† | 9 | 0.864 (0.798-0.935) | 30.08 | 0.178 |  |
| **Cohort study** |  |  |  |  |  |  |
| Subtotal | 5 | 0.874 (0.803-0.951) | 33.18 | 0.200 |  | 0.912 |
| Subtotal† | 4 | 0.882 (0.769-1.011) | 47.30 | 0.128 |  |
| **Invasive BCa** |  |  |  |  |  |  |
| Subtotal | 6 | 0.829 (0.692-0.994) | 59.54 | 0.030 |  | 0.647 |
| Subtotal† | 5 | 0.780 (0.646-0.941) | 41.31 | 0.146 |  |
| **Postmenopausal** |  |  |  |  |  |  |
| Subtotal | 7 | 0.888 (0.798-0.989) | 30.50 | 0.195 |  | 0.539 |
| Subtotal† | 6 | 0.846 (0.757-0.946) | 9.91 | 0.353 |  |
| **Duration of BPs use (year)** |  |  |  |  |  |  |
| **< 1** |  |  |  |  |  |  |
| Subtotal | 5 | 0.904 (0.842-0.970) | 0.00 | 0.522 |  | 0.724 |
| Subtotal† | 4 | 0.873 (0.729-1.046) | 1.33 | 0.385 |  |
| **≥1 (including 1-2, 2-3, 3-4,**  **and >4)** |  |  |  |  |  |  |
| Subtotal | 19 | 0.745 (0.658-0.844) | 74.61 | <0.001 |  | 0.779 |
| Subtotal† | 18 | 0.727 (0.647-0.818) | 57.40 | 0.001 |  |
| **1-2** |  |  |  |  |  |  |
| Subtotal | 5 | 0.690 (0.534-0.893) | 87.00 | <0.001 |  | 0.561 |
| Subtotal† | 4 | 0.629 (0.527-0.750) | 42.47 | 0.157 |  |
| **2-3** |  |  |  |  |  |  |
| Subtotal | 4 | 0.732 (0.554-0.967) | 72.82 | 0.012 |  | 0.694 |
| Subtotal† | 3 | 0.797 (0.579-1.098) | 67.65 | 0.045 |  |
| **3-4** |  |  |  |  |  |  |
| Subtotal | 6 | 0.862 (0.682-1.090) | 59.40 | 0.031 |  | 0.555 |
| Subtotal† | 5 | 0.941 (0.792-1.119) | 0.00 | 0.665 |  |
| **>4** |  |  |  |  |  |  |
| Subtotal | 4 | 0.678 (0.525-0.875) | 38.45 | 0.181 |  | 0.791 |
| Subtotal† | 3 | 0.721 (0.494-1.051) | 54.51 | 0.111 |  |
|  |  |  |  |  |  |  |

Abbreviations: BCa, breast cancer; BPs, bisphosphonates; CI, conﬁdence interval.

*This sensitivity analysis was conducted only when the number of included studies in subgroup analyses was not less than 4. We used a random-effects model to pool the effect estimates and therefore be more conservative.

†The pooled results of sensitivity analyses excluding the study that has the most relative weight in subgroups.

**eTable 6. Characteristics of cohort studies addressing the association between bisphosphonates and the risk of contralateral breast cancer**

| **Study,**  **Country** | **Population characteristics mean age (SD)/median age (range), years** | **Study period, Follow-up duration  mean (SD) , years** | **No. of BPs-users (No. of cases)** | | **No. of nonusers (No. of cases)** | **Types of BPs,  No. of users (%)** | **Data sources of BPs prescription** | **BCa diagnosis** |  | **Adjusted/controlled factors** | **Quality Score* (%)** |
| --- | --- | --- | --- | --- | --- | --- | --- | --- | --- | --- | --- |
|  |  |  |  | |  |  |  |  |  |  |  |
| Kwan 201636  the United States  The KPNC and KPSC cohorts | **KPNC** 59.6 (12.5)  BPs-users: 64.7 (11.0) Non-users: 58.8 (12.5)  **KPSC** 59.7 (12.3)  BPs-users: 64.5 (10.7) Non-users: 58.1 (12.3) | 1996-2009  **KPNC**  BPs-users: 3.59 Non-users: 6.67  **KPSC**  BPs-users: 3.41 Non-users: 7.06 | **KPNC**  1282 (35)  **KPSC**  1973 (26) | **KPNC**  7575 (199)  **KPSC**  5951 (172) | | Any BPs,  Alendronate: most commonly prescribed (>93 %) | From the Kaiser Permanente insurance records | Hospital diagnosis,  from the  cancer registries of the United States |  | Age at diagnosis, year of diagnosis, race/ethnicity, Charlson comorbidity index, AJCC stage, primary therapy, chemotherapy, ER/PR status, Her2 status, post-BC diagnosis osteopenia, osteoporosis, or fracture, and tamoxifen and aromatase inhibitor use | 87 |
| Korde 201837  the United States  The Quilt cohort  joining the cases recruited into three  previous population-based studies of breast cancer, the CARE, PACE and EMF studies | 64.2 (45-79) | 1993-2015  11.8 (2.5-17.6) | 302 (23) | 1511 (139) | | Any BPs,  Alendronate 272(90.0)  Risendronate 40(13.0)  Zoledronate 12(4.0) | From medical record reviews | From the Cancer Surveillance System, the population-based SEER registry |  | Age at diagnosis and source study (the original three studies through which women were ascertained) | 82 |

Abbreviations: BCa, breast cancer; BPs, bisphosphonates; KPNC, the Kaiser Permanente Northern California cohort; KPSC, the Kaiser Permanente Southern California cohort; SD, standard deviation.

*The quality score of each study is presented as a percentage of the maximum score.

**eTable 7. Characteristics of case-control studies addressing the association between bisphosphonates and the risk of contralateral breast cancer**

| **Study, Country,**  **Study design** | **Population characteristics mean age (SD)/median age (range), years** | **Study period** | **No. of cases (No. of BPs-users)** | **No.of controls (No. of BPs-users)** | **Types of BPs,  No. of users (%)** | **Data sources of BPs prescription** | **BCa diagnosis** |  | **Adjusted/controlled factors** | **Quality Score* (%)** |
| --- | --- | --- | --- | --- | --- | --- | --- | --- | --- | --- |
| Monsees 201135  the United States  a nested case-control study from the SEER database  (Population-based  individually matched by age at and year of first breast cancer diagnosis, ethnicity, historic stage of first breast cancer ) | primary invasive, localized or regional SEER historic stage ER+ breast cancer women  61.1 (40-79) | 1990-2007 | 351 (32) | 662 (85) | Any nitrogenous BPs  Alendronate:  106(88.0) | The medical records of the oncology and/or primary care provider | SEER |  | age and year of diagnosis with first primary breast cancer,  SEER historic stage of the first primary breast cancer, county of residence, race/ethnicity and BMI at first breast cancer diagnosis | 84 |

Abbreviations: BCa, breast cancer; BMI, body mass index; BPs, bisphosphonates; SD, standard deviation; SEER, the Surveillance Epidemiology and End Results.

*The quality score of each study is presented as a percentage of the maximum score.

**eTable 8. Publication bias**

| **Subgroups** | **No. of studies** | **P-value** | |  | **Summarized effect estimates (95% CI)*** | |
| --- | --- | --- | --- | --- | --- | --- |
| **For Begg's rank correlation test** | **For Egger's linear regression test** |  | **Adjusted**  **with trim and fill** | **Unadjusted** |
| Total | 10 | 0.721 | 0.698 |  | 0.876 (0.822-0.932) | 0.879 (0.826-0.936) |
| Case-Control study | 3 | 0.296 | 0.117 |  | 0.920 (0.876-0.967) | 0.834 (0.711-0.979) |
| Cohort study | 5 | 0.807 | 0.881 |  | 0.839 (0.767-0.917) | 0.877 (0.811-0.949) |
| Randomized controlled trial | 2 | NA | NA |  | NA | 1.127 (0.808-1.573) |
| Invasive BCa | 6 | 0.851 | 0.966 |  | 0.766 (0.637-0.922) | 0.829 (0.692-0.994) |
| Postmenopausal | 7 | 0.230 | 0.533 |  | 0.866 (0.779-0.962) | 0.888 (0.798-0.989) |
| Duration of BPs treatment (year) | |  |  |  |  |  |
| <1 | 5 | 0.624 | 0.835 |  | 0.904 (0.842-0.970) | 0.904 (0.842-0.970) |
| Subtotal ≥1 | 19 | 0.132 | 0.053 |  | 0.734 (0.648-0.831) | 0.745 (0.658-0.844) |
| 1-2 | 5 | 0.462 | 0.061 |  | 0.818 (0.659-1.014) | 0.690 (0.534-0.893) |
| 2-3 | 4 | 0.734 | 0.915 |  | 0.796 (0.608-1.041) | 0.732 (0.554-0.967) |
| 3-4 | 6 | 0.060 | 0.014 |  | 0.826 (0.665-1.026) | 0.862 (0.682-1.090) |
| >4 | 4 | 0.308 | 0.324 |  | 0.628 (0.484-0.816) | 0.678 (0.525-0.875) |
|  |  |  |  |  |  |  |

Abbreviations: BCa, breast cancer; BPs, bisphosphonates; CI, conﬁdence interval; NA, not applicable.

*The summarized effect estimate was calculated with a random-effects model.

**eTable 9. Levels of evidence for associations between bisphosphonates and primary breast cancer risk**

| **Subgroups** | **No. of studies (%)** | | | **Subtotal** | **Level**  **of evidence** |
| --- | --- | --- | --- | --- | --- |
| **Decreased risk** | **Increased risk** | **No association** |
| Total | 5 (50) | 0 | 5 (50) | 10 | Indecisive |
| Case-Control study | 2 (67) | 0 | 1(33) | 3 | Moderate |
| Cohort study | 3 (60) | 0 | 2 (40) | 5 | Moderate |
| RCTs | 0 | 0 | 2(100) | 2 | Indecisive |
| Invasive BCa | 3 (50) | 0 | 3(50) | 6 | Indecisive |
| Postmenopausal | 3 (43) | 0 | 4 (57) | 7 | Indecisive |
| Duration of bisphosphonnate use (year) | |  |  |  |  |
| < 1 | 2 (40) | 0 | 3 (60) | 5 | Nil |
| ≥ 1 (subtotal) | 13 (68) | 0 | 6 (32) | 19 | Strong |
| Abbreviations: BCa, breast cancer; BPs, bisphosphonates. | | | | | |

**Supplementary FIGURES**

**eFigure 1. Forest plot for the association between bisphosphonates and the risk of primary invasive breast cancer.** Square markers indicate effect sizes of each study; horizontal lines, the 95% conﬁdence intervals. The diamond data marker indicates the summarized effect size. The vertical solid line indicates the overall pooled effect. Note that the studies are ranked in order of their relative weights from random effects analysis. RR, relative risk.

**eFigure 2. Forest plot for the association between bisphosphonates and primary breast cancer risk in postmenopausal women.** Square markers indicate effect sizes of each study; horizontal lines, the 95% conﬁdence intervals. The diamond data marker indicates the summarized effect size. The vertical solid line indicates the overall pooled effect. Note that the studies are ranked in order of their relative weights from random effects analysis. RR, relative risk.

**eFigure 3. Subgroup analyses of the association between bisphosphonates and primary breast cancer risk according to duration of bisphosphonate use.** <1 indicates the subgroup of bisphosphonate users with less than one year use of bisphosphonates; 1-2, one year or more but less than two years; 2-3, two years or more but less than three years; 3-4, three years or more but less than four years; ≥4, 4 years or more. Square markers indicate effect sizes of each study; horizontal lines, the 95% conﬁdence intervals. The diamond data marker indicates the summarized effect size. Note that the studies are ranked in order of their relative weights from random effects analysis. RR, relative risk.

**eFigure 4. Cumulative meta-analysis of the association between bisphosphonates and primary breast cancer risk according to duration of bisphosphonate use.** Square markers indicate effect sizes of each study; horizontal lines, the 95% conﬁdence intervals. The vertical solid line indicates the overall pooled effect. RR, relative risk.

**eFigure 5. A sensitivity analysis by excluding retrospective case-control studies.** Square markers indicate effect sizes of each study; horizontal lines, the 95% conﬁdence intervals. The diamond data marker indicates the summarized effect size. The vertical solid line indicates the overall pooled effect. Note that the studies are ranked in order of their relative weights from random effects analysis. HORIZON-PFT, Health Outcomes and Reduced Incidence with Zoledronic Acid Once Yearly–Pivotal Fracture Trial; FIT, Fracture Intervention Trial; RR, relative risk.

**eFigure 6. A sensitivity analysis by excluding randomized controlled trials.** Square markers indicate effect sizes of each study; horizontal lines, the 95% conﬁdence intervals. The diamond data marker indicates the summarized effect size. The vertical solid line indicates the overall pooled effect. Note that the studies are ranked in order of their relative weights from random effects analysis. RR, relative risk.

**eFigure 7. Forest plot for the association between bisphosphonates and the risk of contralateral breast cancer in women with primary breast cancer.** Square markers indicate effect sizes of each study; horizontal lines, the 95% conﬁdence intervals. The diamond data marker indicates the summarized effect size of the observational studies included in this meta-analysis and the vertical solid line indicates the overall pooled effect. The studies are ranked in order of their relative weights from random effects analysis. Note that the EBCTCG’ study (Early Breast Cancer Trialists’ Collaborative Group) is a meta-analysis of individual patient data from randomized controlled trials of adjuvant bisphosphonate treatment in early breast cancer patients. RR, relative risk.

**eFigure 8. A sensitivity analysis by combining the results from studies addressing the associations of bisphosphonates with the risk of both primary and contralateral breast cancer.** Square markers indicate effect sizes of each study; horizontal lines, the 95% conﬁdence intervals. The diamond data marker indicates the summarized effect size. The vertical solid line indicates the overall pooled effect. Note that the studies are ranked in order of their relative weights from random effects analysis EBCTCG, Early Breast Cancer Trialists’ Collaborative Group; HORIZON-PFT, Health Outcomes and Reduced Incidence with Zoledronic Acid Once Yearly–Pivotal Fracture Trial; FIT, Fracture Intervention Trial; RR, relative risk.

**eFigure 9. Meta-regression analyses of the association between bisphosphonates and primary breast cancer risk according to (A) the mean age of participants, (B) the quality score, (C) the total number of breast cancer patients and (D) the total number of bisphosphonate users in each original study.** Each circle represents an original study and the circle size is proportional to the relative weight of the study using random-effects meta-regression analysis.

**eFigure 9A**

**eFigure 9B**

**eFigure 9C**

**eFigure 9D**

**eFigure 10. Funnel plots of potential publication.** White circles indicate individual studies; black circles, trimmed studies after adjustment for potential publication bias; white diamonds, the summarized effect estimates from the meta-analyses; black diamonds, the adjusted summary effect estimates. The diagonal lines represent the 95% confidence interval of the summarized effect estimate, which is indicated by the vertical solid line. RR, relative risk.

**eFigure 11. Risk of bias of randomized controlled trials.** (**A**)Judgements about each risk of bias item for each included study; (**B**) Judgements about each risk of bias item presented as percentages across all included studies.

**APPENDICES**

**Appendix A. PRISMA Checklist**

|  | **Section/topic** | **#** | **Checklist item** | **Reported on page # (or Brief description of how the criteria were handled in the meta-analysis)** |
| --- | --- | --- | --- | --- |
|  | **TITLE** | | |  |
| √ | Title | 1 | Identify the report as a systematic review, meta-analysis, or both. | Title page. Bisphosphonates and primary breast cancer risk: an updated systematic review and meta-analysis involving 963,995 women. |
|  | **ABSTRACT** | | |  |
| √ | Structured summary | 2 | Provide a structured summary including, as applicable: background; objectives; data sources; study eligibility criteria, participants, and interventions; study appraisal and synthesis methods; results; limitations; conclusions and implications of key findings; systematic review registration number. | Page 5-6. A structured abstract is provided on page 5-6. |
|  | **INTRODUCTION** | | |  |
| √ | Rationale | 3 | Describe the rationale for the review in the context of what is already known. | Page 7. Prevention of primary breast cancer (BCa) in women is of great public health importance. The existing results from observational epidemiologic studies focused on the association between bisphosphonates and primary BCa risk have been inconsistent. |
| √ | Objectives | 4 | Provide an explicit statement of questions being addressed with reference to participants, interventions, comparisons, outcomes, and study design (PICOS). | Page 7. Does the use of bisphosphonates reduce the risk of primary breast cancer in women? The participants are women. The exposure or intervention is the use of any type of bisphosphonates. The outcome is the risk of developing primary breast cancer. The comparison is bisphosphonate users versus non-users. Study designs include cohort studies, case-control studies, and randomized controlled trials. |
|  | **METHODS** | | |  |
| √ | Protocol and registration | 5 | Indicate if a review protocol exists, if and where it can be accessed (e.g., Web address), and, if available, provide registration information including registration number. | Page 8. This meta-analysis was registered on PROSPERO (CRD42014014901). |
| √ | Eligibility criteria | 6 | Specify study characteristics (e.g., PICOS, length of follow-up) and report characteristics (e.g., years considered, language, publication status) used as criteria for eligibility, giving rationale. | Page 8-9. Detailed inclusion and exclusion criteria were described in the methods section. |
| √ | Information sources | 7 | Describe all information sources (e.g., databases with dates of coverage, contact with study authors to identify additional studies) in the search and date last searched. | Page 8. Databases: MEDLINE, EMBASE, ProQuest, and Web of Science;  Time period: the first search - through August 15, 2016; the updated search – from August 15, 2016 to June 25, 2018. We hand-searched reference sections and citation lists of the retrieved literature for additional references. If an abstract was identified, we had tried to contact with the authors to access their data. |
| √ | Search | 8 | Present full electronic search strategy for at least one database, including any limits used, such that it could be repeated. | Page 8. We systematically searched several databases and conducted additional hand-searching to include all available studies. The detailed search terms are provided on page 8. |
| √ | Study selection | 9 | State the process for selecting studies (i.e., screening, eligibility, included in systematic review, and, if applicable, included in the meta-analysis). | Page 9 and Figure 1. The eligibility determination for each study were performed independently by two authors (YP.L. and XS.Z.). Disagreements were resolved by discussion and consensus with a third author (HR.S.). The detailed process for study selection is provided as the flow chart (Figure 1). |
| √ | Data collection process | 10 | Describe method of data extraction from reports (e.g., piloted forms, independently, in duplicate) and any processes for obtaining and confirming data from investigators. | Page 9. The data extraction, and quality assessment for each study were performed independently by two authors (YP.L. and XS.Z.). Disagreements were resolved by discussion and consensus with a third author (HR.S.). |
| √ | Data items | 11 | List and define all variables for which data were sought (e.g., PICOS, funding sources) and any assumptions and simplifications made. | Page 9. Standard electronic forms specifically created for the present study were used to record the variables, which were described in the main text. Also see eTable 1-3, 6 and 7 in the Supplementary Materials. |
| √ | Risk of bias in individual studies | 12 | Describe methods used for assessing risk of bias of individual studies (including specification of whether this was done at the study or outcome level), and how this information is to be used in any data synthesis. | Page 9-10. A quality-scoring system was used for assessding risk of bias of observational studies; and the Jadad score and Cochrane risk of bias tool were used to assess the quality of RCTs. |
| √ | Summary measures | 13 | State the principal summary measures (e.g., risk ratio, difference in means). | Page 9. The principal summary measures include relative risks, odds ratios and hazard ratio with 95% confidence intervals. |
| √ | Synthesis of results | 14 | Describe the methods of handling data and combining results of studies, if done, including measures of consistency (e.g., I2) for each meta-analysis. | Page 10-11. We preferentially used the maximally adjusted effect estimates in this meta-analysis. The 95% confidence intervals of summarized estimates were all provided. I2 values and P values for heterogeneity were reported. The summarized results with corresponding 95% confidence intervals of sensitivity analyses were provided. The confounding RR values and the corresponding P values were provided. The E values for the pooled estimates and the lower or upper limits were provided. |
|  |  |  |  |  |
|  | **Section/topic** | **#** | **Checklist item** | **Reported on page # (or Brief description of how the criteria were handled in the meta-analysis)** |
| √ | Risk of bias across studies | 15 | Specify any assessment of risk of bias that may affect the cumulative evidence (e.g., publication bias, selective reporting within studies). | Page 11. We used funnel plots for asymmetry, the Begg’s rank correlation and Egger’s linear regression tests, and the Duval and Tweedie’s trim and fill method to assess the potential publication bias. |
| √ | Additional analyses | 16 | Describe methods of additional analyses (e.g., sensitivity or subgroup analyses, meta-regression), if done, indicating which were pre-specified. | Page 10-11. We performed extensive sensitivity analyses, such as confounding RR, the E-value analysis, subgroup analyses, etc. |
|  | **RESULTS** | | |  |
| √ | Study selection | 17 | Give numbers of studies screened, assessed for eligibility, and included in the review, with reasons for exclusions at each stage, ideally with a flow diagram. | Figure 1. Details of the literature search process are outlined in the flow chart (Figure 1). |
| √ | Study characteristics | 18 | For each study, present characteristics for which data were extracted (e.g., study size, PICOS, follow-up period) and provide the citations. | Page 12 in the main text and eTable 1-3, 6 and 7 in the Supplementary Materials. |
| √ | Risk of bias within studies | 19 | Present data on risk of bias of each study and, if available, any outcome level assessment (see item 12). | Page 12 in the main text and eFigure 11 for RCTs and Appendix B for cohort and case-control studies in the Supplementary Materials. |
| √ | Results of individual studies | 20 | For all outcomes considered (benefits or harms), present, for each study: (a) simple summary data for each intervention group (b) effect estimates and confidence intervals, ideally with a forest plot. | Figure 2 in the main text and eFigure 1-8 in the Supplementary Materials. |
| √ | Synthesis of results | 21 | Present results of each meta-analysis done, including confidence intervals and measures of consistency. | Page 12-13. Figure 2 in the main text and eFigure 1-8 in the Supplementary Materials.. |
| √ | Risk of bias across studies | 22 | Present results of any assessment of risk of bias across studies (see Item 15). | Page 14-15. eTable 8 and eFigure 10 in the Supplementary Materials. |
| √ | Additional analysis | 23 | Give results of additional analyses, if done (e.g., sensitivity or subgroup analyses, meta-regression [see Item 16]). | Page 13-14. Table 1 in the main text; eTable 4-5 and eFigure 1, 2, 5-8 in the Supplementary Materials. |
|  | **DISCUSSION** | | |  |
| √ | Summary of evidence | 24 | Summarize the main findings including the strength of evidence for each main outcome; consider their relevance to key groups (e.g., healthcare providers, users, and policy makers). | Page 15. We found a 12% risk reduction of BCa associated with bisphosphonates, which has strengthened the evidence for anticancer effects of bisphosphonates in the BCa primary prevention. However, according to the evidence synthesis, there is a general "indecisive" evidence for this association. |
| √ | Limitations | 25 | Discuss limitations at study and outcome level (e.g., risk of bias), and at review-level (e.g., incomplete retrieval of identified research, reporting bias). | Page 19-20. Detailed limitations of this study are provided in the Discussion section of the main text. |
| √ | Conclusions | 26 | Provide a general interpretation of the results in the context of other evidence, and implications for future research. | Page 20. Our findings added to the body of evidence for the association between bisphosphonates and a decreased risk of primary breast cancer. However, we can not draw a decisive conclusion based on the current evidence. There is still a long way to go before the use of bisphosphonates as breast cancer chemoprevention strategy in routine practices. |
|  | **FUNDING** | | |  |
| √ | Funding | 27 | Describe sources of funding for the systematic review and other support (e.g., supply of data); role of funders for the systematic review. | Page 2. Funding sources are provided on the title page. |

*From:* Moher D, Liberati A, Tetzlaff J, Altman DG, The PRISMA Group (2009). Preferred Reporting Items for Systematic Reviews and Meta-Analyses: The PRISMA Statement. PLoS Med 6(7): e1000097. doi:10.1371/journal.pmed1000097.

**Appendix B.** Methodological quality score of the cohort and case-control studies

| **Study name** | **Score of methodological quality** | | | | | | | | | | | | | | | | | | | |
| --- | --- | --- | --- | --- | --- | --- | --- | --- | --- | --- | --- | --- | --- | --- | --- | --- | --- | --- | --- | --- |
| **1 (0/4/8)** | **2 (0/4/7)** | **3 (0/4/7)** | **4 (0/10)** | **5 (0/8)** | **6 (0/4)** | **7 (0/4/6)** | **8 (0/2)** | **9 (0/6)** | **10 (0/4/6)** | **11 (0/4)** | **12 (0/4)** | **13 (0/8)** | **14 (0/6)** | **15 (0/4/9)** | **Selection bias  40**  **(1-5 items)** | **Misclassification bias 40**  **(6-13 items)** | **Confounding bias 15**  **(14-15 items)** | **Total** | **Reporting score (%)*** |
| **Cohort studies** |  |  |  |  |  |  |  |  |  |  |  |  |  |  |  |  |  |  |  |  |
| Chiang 2012 Taiwan, China | **0** | **7** | **7** | **10** | **8** | **4** | **6** | **0** | **6** | **6** | **4** | **0** | **8** | **6** | **4** | **32** | **34** | **10** | **76** | **80** |
| Cardwell 2011 United Kingdom | **0** | **7** | **7** | **10** | **8** | **4** | **6** | **2** | **6** | **6** | **4** | **4** | **8** | **6** | **4** | **32** | **40** | **10** | **82** | **86** |
| Vestergaard 2011 Denmark | **0** | **7** | **7** | **10** | **8** | **4** | **6** | **2** | **6** | **6** | **0** | **0** | **8** | **6** | **4** | **32** | **32** | **10** | **74** | **78** |
| Chlebowski 2010 USA | **0** | **7** | **7** | **10** | **8** | **4** | **4** | **2** | **6** | **6** | **0** | **0** | **8** | **6** | **9** | **32** | **30** | **15** | **77** | **81** |
| Lee 2012  Taiwan, China | **0** | **7** | **7** | **10** | **8** | **0** | **6** | **0** | **6** | **6** | **4** | **0** | **8** | **0** | **4** | **32** | **30** | **4** | **66** | **69** |
| Fournier 2017  French | **4** | **7** | **7** | **10** | **8** | **4** | **4** | **2** | **6** | **6** | **4** | **0** | **8** | **6** | **9** | **36** | **34** | **15** | **85** | **89** |
| Kwan 2016  USA | **0** | **7** | **7** | **10** | **8** | **4** | **6** | **2** | **6** | **6** | **4** | **0** | **8** | **6** | **9** | **32** | **36** | **15** | **83** | **87** |
| Korde 2018  USA | **4** | **7** | **7** | **10** | **8** | **0** | **6** | **2** | **6** | **6** | **4** | **0** | **8** | **6** | **4** | **36** | **32** | **10** | **78** | **82** |
| **Case-control studies** |  |  |  |  |  |  |  |  |  |  |  |  |  |  |  |  |  |  |  |  |
| Rennert 2010 Israel | **0** | **0** | **7** | **10** | **8** | **4** | **6** | **2** | **6** | **4** | **4** | **0** | **8** | **6** | **9** | **25** | **34** | **15** | **74** | **78** |
| Newcomb 2010 USA | **0** | **4** | **7** | **10** | **8** | **4** | **4** | **2** | **6** | **6** | **0** | **0** | **8** | **6** | **4** | **29** | **30** | **10** | **69** | **73** |
| Vinogradova 2013 United Kingdom | **0** | **0** | **7** | **10** | **8** | **4** | **6** | **2** | **6** | **6** | **4** | **0** | **8** | **6** | **4** | **25** | **36** | **10** | **71** | **75** |
| Monsees 2011  USA | **4** | **4** | **7** | **10** | **8** | **0** | **6** | **2** | **6** | **6** | **4** | **0** | **8** | **6** | **9** | **33** | **32** | **15** | **80** | **84** |

*The quality score of each study was presented as a percentage of the maximum score, and studies with a score more than 50% were categorized as high-quality studies.
